# Supplementary material
Source: publisher site journal article supplement (https://e-cmh.org/upload/media/cmh-2024-0038-Supplementary-Table-2.pdf)
Supplement: Supplementary file 1 [file cmh-2024-0038-Supplementary-Table-2.pdf]

**Supplementary Table 2.** Cox sub-distribution hazards model for risk factors of HCC development among CHC patients in whom antiviral therapy failed, with liver cirrhosis or advanced fibrosis (FIB-4≥3.25) as the confounding factor

| Variables        | Based on LC      |         |                  | Based on advanced fibrosis |         |                  |
|------------------|------------------|---------|------------------|----------------------------|---------|------------------|
|                  | aSHR (95% CI)    | P-value | aSHR (95% CI)    | aSHR (95% CI)              | P-value | aSHR (95% CI)    |
| Age (years)      |                  |         |                  |                            |         |                  |
| <65              | 1                |         | 1                | 1                          |         | 1                |
| ≥65              | 1.89 (1.52–2.36) | <0.001* | 1.89 (1.52–2.36) | 1.35 (1.11–1.87)           | 0.012*  | 1.35 (1.11–1.87) |
| Sex              |                  |         |                  |                            |         |                  |
| Female           | 1                |         | 1                | 1                          |         | 1                |
| Male             | 1.14 (0.92–1.40) | 0.225   | 1.14 (0.92–1.40) | 1.02 (0.77–1.23)           | 0.589   | 1.02 (0.77–1.23) |
| Aspirin          |                  |         |                  |                            |         |                  |
| No               | 1                |         | 1                | 1                          |         | 1                |
| Yes              | 0.71 (0.51–1.00) | 0.049*  | 0.71 (0.51–1.00) | 0.73 (0.55–1.02)           | 0.079   | 0.73 (0.55–1.02) |
| DM/metformin     |                  |         |                  |                            |         |                  |
| Non-DM           | 1                |         | 1.05 (0.76–1.44) | 1                          |         | 1.05 (0.81–1.45) |
| DM/metformin (+) | 0.95 (0.69–1.31) | 0.763   | 1                | 0.95 (0.69–1.24)           | 0.650   | 1                |
| DM/metformin (-) | 1.51 (1.12–2.04) | 0.007*  | 1.59 (1.07–2.36) | 1.54 (1.16–2.03)           | 0.005*  | 1.60 (1.13–2.85) |
| HLP/statin       |                  |         |                  |                            |         |                  |
| Non-HLP          | 1                |         | 2.02 (1.46–2.78) | 1                          |         | 2.00 (1.49–2.94) |
| HLP/statin (+)   | 0.50 (0.36–0.68) | <0.001* | 1                | 0.47 (0.34–0.67)           | <0.001* | 1                |
| HLP/statin (-)   | 0.75 (0.44–1.28) | 0.289   | 1.51 (0.83–2.75) | 0.68 (0.38–1.10)           | 0.145   | 1.40 (0.76–2.54) |
| FIB-4            |                  |         |                  |                            |         |                  |
| <3.25            | -                |         | -                | 1                          |         | 1                |
| ≥3.25            | -                |         | -                | 3.01 (2.45–3.64)           | <0.001* | 3.01 (2.45–3.64) |
| Liver cirrhosis  |                  |         |                  |                            |         |                  |
| No               | 1                |         | 1                | -                          |         | -                |
| Yes              | 2.27 (1.81–2.85) | <0.001* | 2.27 (1.81–2.85) | -                          |         | -                |
| HCV RNA (IU/mL)  |                  |         |                  |                            |         |                  |
| ≤8,000,000       | 1                |         | 1                | 1                          |         | 1                |
| >8,000,000       | 0.73 (0.51–1.04) | 0.079   | 0.73 (0.51–1.04) | 0.89 (0.50–1.12)           | 0.121   | 0.89 (0.50–1.12) |
| HCV genotype     |                  |         |                  |                            |         |                  |
| Non-1            | 1                |         | 1                | 1                          |         | 1                |
| 1                | 1.30 (1.04–1.63) | 0.022*  | 1.30 (1.04–1.63) | 1.41 (1.01–1.64)           | 0.036*  | 1.41 (1.01–1.64) |

DM, diabetes mellitus; HLP, hyperlipidemia; FIB-4, fibrosis index based on four factors; LC, liver cirrhosis; HCC, hepatocellular carcinoma; aSHR, adjusted sub-distribution hazard ratio.

\*p<0.05.
